# Supplementary material for: A Square Wave Alternating Current Preheating with High Applicability and Effectiveness of Preventing Lithium Plating
Source: MDPI journal article supplement (doi:10.3390/pr11041089), 2023-04-04
Supplement: s1 [file s1]

Archive with 1 entries (1 files):
- processes-2180996-supplementary.pdf
